# Supplementary material for: Multicomponent parenteral lipid emulsions do not prevent liver injury in neonatal pigs with obstructive cholestasis
Source: JCI Insight. 2025 Apr 17;10(10):e189196. doi: 10.1172/jci.insight.189196 (PMC12128955; doi:10.1172/jci.insight.189196)
Supplement: Supporting data values [file jciinsight-10-189196-s193.xlsx]

## Sheet: Fig 1A
ENT-sham	ENT-BDL	SLE-sham	SLE-BDL	MLE-sham	MLE-BDL
0.05	2.19	1.67	1.23	0.2	1.24
0.04	1.6	1.35	2.43	0.23	1.52
0.04	1.12	0.03	2.18	0.26	1.87
0.06	1.16	1.3	1.59	0.21	1.47
0.03	1.16	1.79	1.76	0.33	1.51
0.07	2.23	2.49	1.57	0.27	1.46
0.04	0.6	1.8	2.71	0.18	1.86
0.07	0.8	0.32	2.18	0.25	0.69
0.09	0.86	1.17	1.91	0.45	1.1
0.06	0.89		2.54
0.1	0.58		0.62
0.06			1.59
			2.22

## Sheet: Fig 1B
ENT-sham	ENT-BDL	SLE-sham	SLE-BDL	MLE-sham	MLE-BDL
67.62	884.7	322.29	438.72	68.62	513.42
50.15	1332.74	92.01	432.49	42.95	526.76
59.6	212.46	336.83	802.9	66.78	1230
57.15	366.87	262.09	377.71	71.87	1444.55
34.54	302.09	67.14	386.81	72.71	1044
25.3	355.51	395.04	212.86	89.96	576.98
35.71	497.14	177.42	977.55	44.63	767.86
24.8	210.98	426.08	646.9	54.52	340.44
44.45	523.07	250.61	932.25	63.92	494.34
52.16	316.96	91.64	323.28
36.15	166.37	90.89	206.96
50.81			296.07
			544.6

## Sheet: Fig 1C
ENT-sham	ENT-BDL	SLE-sham	SLE-BDL	MLE-sham	MLE-BDL
35.85	33.59	39.29	66.88	25.18	55.22
26.85	51.4	64.66	52.8	24.16	55.26
14.87	33.26	26.38	79.26	31.05	109.55
15.34	31.44	103.93	36.74	31.18	91.4
29.29	31.16	20.53	33.98	47.65	100.16
29.4	21.23	33.39	21.87	29.3	45.25
24.92	30.87	34.76	175.44	25.82	106.46
25.85	34.38	34.38	170.26	32.1	29.88
17.86	27.78	25.65	36.28	27.7	36.99
22.3	38.33	32.42	99.07
21.78	42.36	41.69	33.55
15.37			28.83
			37.18

## Sheet: Fig 2A
ENT-sham	ENT-BDL	SLE-sham	SLE-BDL	MLE-sham	MLE-BDL
51.528	39.8097	52.6163	40.3139	51.3093	48.5459
45.5774	41.0493	49.121	33.3952	58.6734	53.348
55.7667	46.8063	50.1336	32.6201	56.6822	63.7891
48.7419	45.5643	45.7546	36.0223	44.062	55.0379
51.3903	43.6322	44.2328	38.5945	46.168	51.3446
53.5115	50.6541	43.8426	42.7656	44.5931	52.7555
55.56	48.369	29.2946	51.8448	54.7479	59.8921
57.3588	51.7338	41.4599	48.4103	52.8153	57.6063
55.7536	50.9751	49.2463	40.8472	54.7364	64.7727
48.6964	49.5734	51.8818	45.7875	49.4348	54.9705
52.2605		43.9826	48.6006
			47.4435

## Sheet: Fig 2B
ENT-sham	ENT-BDL	SLE-sham	SLE-BDL	MLE-sham	MLE-BDL
34.3188	61.5232	52.1489	49.2487	35.106	52.3361
32.1816	50.7391	33.1098	52.4737	37.2117	40.1016
32	38.292	44.9715	53.6836	36.5146	46.4273
31.3994	46.8465	45.7691	52.5069	34.3278	66.4289
29.8835	45.2526	52.1719	62.963	35.5822	62.57
31.2364	43.0906	41.3824	47.8354	35.3616	65.6627
34.9023	40.2353	47.8354	58.7949	41.4803	49.1772
32.519	43.714	44.9876	48.0895	37.7824	58.5559
35.9871	38.0676	49.5319	58.7059	37.1789	47.0334
30.07	39.8242	40.1837	55.7449	39.1289	55.6043
30.3659		45.0452	55.981
			51.9906

## Sheet: Fig 2C
ENT-sham	ENT-BDL	SLE-sham	SLE-BDL	MLE-sham	MLE-BDL
45.2457	40.1912	26.3987	25.5147	23.1542	17.766
45.6808	42.4982	29.8198	30.0526	19.4182	17.8416
42.5388	56.4738	27.952	29.3261	15.7939	16.0595
45.2707	43.086	30.9806	31.0193	22.4125	26.4778
44.1084	46.4529	29.9548	22.2399	23.6782	21.5727
50.0542	55.9931	32.298	25.5251	24.5283	20.666
55.2054	48.6863	25.5251	28.3528	26.2522	25.6013
63.9911	42.5029	23.1745	28.2495	27.6159	20.9
48.5734	43.8612	25.3009	24.549	24.0921	22.7823
47.3416	37.0898	24.6683	22.0402	22.9993	30.7539
55.1265		25.9663	22.351
			20.8933

## Sheet: Fig 3B
ENT-sham	ENT-BDL	SLE-sham	SLE-BDL	MLE-sham	MLE-BDL
4.754	4.193	3.977	2.61	2.213	8.179
2.163	7.746	3.17	7.081	3.25	6.74
2.618	14.939	3.29	4.495	3.021	6.505
2.395	8.476	2.585	3.929	6.584	21.766
3.481	1.526	4.819	7.547	2.54	10.602
4.777	3.368		8.893	1.841	6.116
2.588	6.761		9.537	4.407
1.811			7.404
3.083			5.577
0.824			9.053
			5.971
			13.881

## Sheet: Fig 3D
ENT-sham	ENT-BDL	SLE-sham	SLE-BDL	MLE-sham	MLE-BDL
7.417	15.916	3.547	6.642	5.744	9.465
1.861	7.215	9.693	2.113	7.997	7.839
3.343	13.669	6.62	6.414	10.223	4.516
7.972	7.6	2.217	13.199	5.35	18.517
3.535		2.764		2.305	8.972
		6.051		6.583	4.68
		5.25		3.25	7.391
					16.481
					3.657

## Sheet: Fig 3E
ENT-sham	ENT-BDL	SLE-sham	SLE-BDL	MLE-sham	MLE-BDL
1.43616	10.2461	1.22215	3.81702	1.54894	5.4976
2.37115	9.75893	1.45649	3.46324	0.616481	5.64506
1.88701	4.09715	2.75395	3.75798	1.74306	5.00788
1.29765	4.26997	2.78443	1.23861	2.05089	6.45503
1.60117	2.27768	1.4846	2.66388	2.01044	5.83888
3.5723	1.45357	0.928814	3.89475	2.093	4.80503
1.66956	3.94199	2.22086	3.94357	1.80052	4.79588
1.50925	6.97535	2.30046	3.64035	0.941225	3.60382
4.42215	5.01492	3.24028	4.89012	2.21437
2.7126	4.86949	2.03717	3.06106
1.0859	3.22953		5.63659

## Sheet: Fig 3F
ENT-sham	ENT-BDL	SLE-sham	SLE-BDL	MLE-sham	MLE-BDL
12.4667	15.7681	12.2863	15.5106	11.7633	12.9114
13.1775	19.8352	10.5658	21.0688	17.4703	13.8135
9.29774	17.436	11.9132	12.5476	10.2125	21.3296
14.7456	7.58677	13.6851	13.8517	12.1727	15.8567
13.9202	10.2558	14.464	14.9878	7.13915	18.2904
15.623	15.5013	10.8214	15.9757	12.4826	16.5046
10.5748	8.12947	12.5721	12.7039	14.2973	21.016
9.13477	14.7029	13.4337	12.8919	11.3603	15.411
14.311	16.0864	11.7373	14.0804	9.80507
11.9678	14.2969	11.0054	12.5269
13.4308			11.995

[truncated: 12 more sheets: Fig 3G, Fig 4A, Fig 4B, Fig 4C, Fig 4D, Fig 4E-G, Fig 4H, Fig 4I, Fig 4J, Fig 4K, Fig 6A-U, S2, S1]
